# Supplementary material for: Consensus on a jockey’s injury prevention framework for video analysis: a modified Delphi study
Source: HighWire-hosted journal article supplement (doi:10.1136/bmjsem-2022-001441), 2022-12-01
Supplement: bmjsem-2022-001441supp001_data_supplement.pdf [file bmjsem-2022-001441supp001_data_supplement.pdf]

## Supplementary Material

### Consensus on a jockey's injury prevention framework for video analysis: a modified Delphi study

#### Contents

|                                                                                                  |   |
|--------------------------------------------------------------------------------------------------|---|
| Supplementary Material .....                                                                     | 1 |
| Consensus on a jockey's injury prevention framework for video analysis: a modified Delphi study. | 1 |
| Appendix 1: .....                                                                                | 2 |
| Horse Racing Video Analysis Consensus Group .....                                                | 2 |
| Appendix 2: .....                                                                                | 3 |
| Figure 1: Flow chart of Delphi process.....                                                      | 3 |
| Appendix 3: .....                                                                                | 4 |
| Table 1: Table showing analysis phase description .....                                          | 4 |
| Appendix 4: .....                                                                                | 5 |
| Table 2: Dates and number of attendees per Delphi round .....                                    | 5 |
| Appendix 5: .....                                                                                | 6 |
| Table 3: Number of descriptors and mean level of agreement for each analysis phase .....         | 6 |

## Appendix 1:

### Horse Racing Video Analysis Consensus Group

1. Dr Jerry Hill - Chief Medical Advisor, British Horseracing Authority, London, England
2. Mr Richard Perham - Senior Jockey Coach, British Racing School, Newmarket, England
3. Mrs Claire Williams - Executive Director, British Equestrian Trade Association, Wetherby, England
4. Ms Lisa Hancock - Chief Executive, The Injured Jockeys Fund, Newmarket, England
5. Dr Anna Louise McKinnon - Head of Clinical Services, The Injured Jockeys Fund, Newmarket, England
6. Mr Paul Struthers - Former Chief Executive, The Professional Jockeys Association, Newbury, England
7. Mr Jason Harvey - Consultant Spinal Surgeon, Fortius Clinic, London, England
8. Prof. Michael Gilchrist - Medical Engineering, University College Dublin, Dublin, Ireland
9. Ms Kerry Kuznik - Medical Assistant and Jockey Athlete Research Coordinator, British Horseracing Authority, London, England
10. Mr Kevin Jones - Professional Jump Jockey, England
11. Miss Page Fuller - Professional Jump Jockey, England
12. Mr Jamie Moore - Professional Jump Jockey, England
13. Miss Bryony Frost - Professional Jump Jockey, England
14. Ms Hollie Doyle - Professional Flat Jockey, England
15. Mr Jim Crowley - Professional Flat Jockey, England
16. Mr David Egan - Professional Flat Jockey, England
17. Mr Tom Marquand - Professional Flat Jockey, England

## Appendix 2:

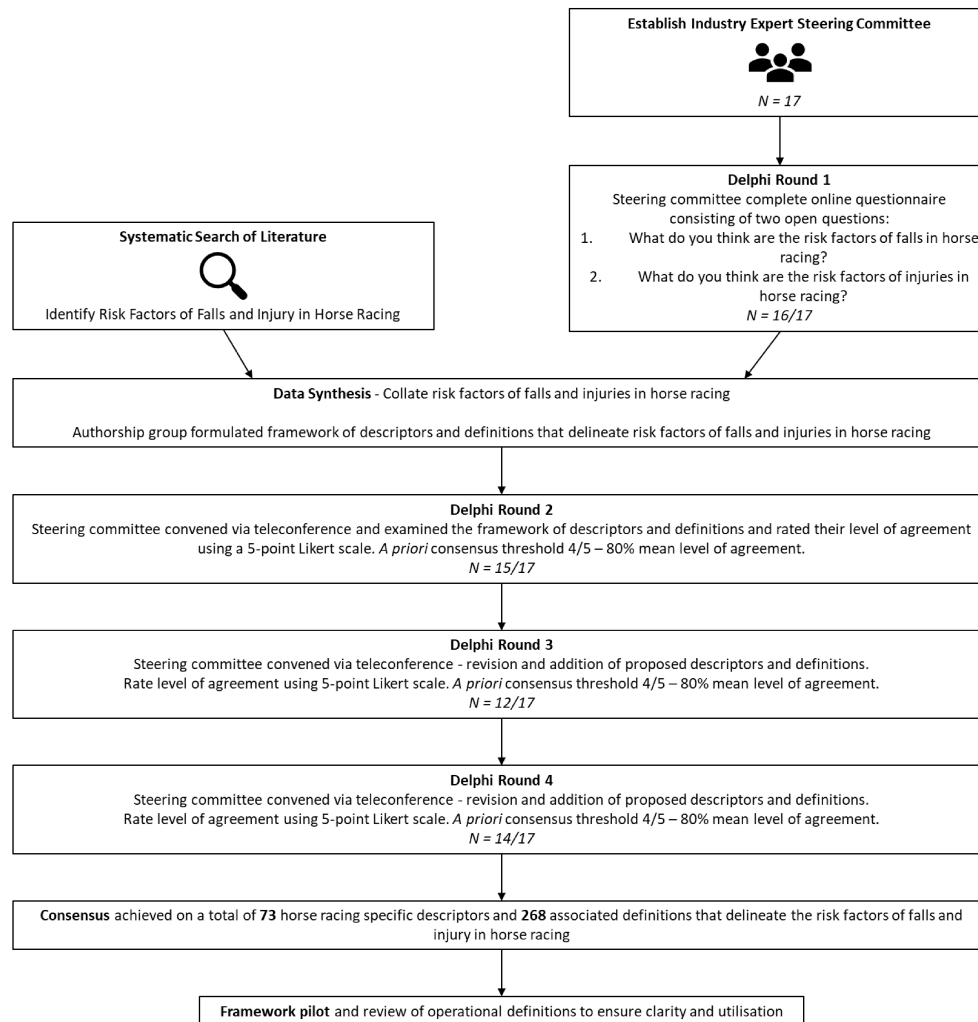

Figure 1: Flow chart of Delphi process

## Appendix 3:

Table 1: Table showing analysis phase description

| <b>Analysis Phase</b>               | <b>Analysis Phase Description</b>                                                                                                                                                                      |
|-------------------------------------|--------------------------------------------------------------------------------------------------------------------------------------------------------------------------------------------------------|
| <b>Situational</b>                  | Environmental conditions prior to / under which the inciting event occurred. Including, location, surface type, obstacles (where relevant), competitive scenario, jockey, horse and opponent behaviour |
| <b>Gross Fall</b>                   | Obvious characteristics of fall including type of inciting event e.g., fall or unseating                                                                                                               |
| <b>Flight Phase</b>                 | Specific biomechanical characteristics of the flight / fall phase prior to jockey sustaining impact                                                                                                    |
| <b>Contact Occurrence</b>           | Sequence and characteristics of impacts sustained during fall / inciting event                                                                                                                         |
| <b>Axial Skeleton</b>               | Specific characteristics involving the axial skeleton during the fall / inciting event                                                                                                                 |
| <b>Subsequent Impact / Recovery</b> | Jockey behaviour and characteristics of any subsequent impact sustained and the recovery immediately following a fall / inciting event                                                                 |

## Appendix 4:

Table 2: Dates and number of attendees per Delphi round

| <b>Delphi Round</b> | <b>Date</b> | <b>Number Invited</b> | <b>Number of Attendees</b> |
|---------------------|-------------|-----------------------|----------------------------|
| <b>1</b>            | 25/09/2020  | 17                    | 16                         |
| <b>2</b>            | 05/11/2020  | 17                    | 15                         |
| <b>3</b>            | 17/12/2020  | 17                    | 12                         |
| <b>4</b>            | 02/02/2021  | 17                    | 14                         |

## Appendix 5:

Table 3: Number of descriptors and mean level of agreement for each analysis phase

| <b>Analysis Phase / Subsection</b> | <b>Number of Descriptors</b> | <b>Number of Definitions</b> | <b>Mean Level of Agreement</b> |
|------------------------------------|------------------------------|------------------------------|--------------------------------|
| <b>Situational</b>                 | 21                           | 77                           | 4.5 (3.8 – 5)                  |
| <b>Gross Fall</b>                  | 10                           | 33                           | 4.7 (4.2 – 5)                  |
| <b>Flight Phase</b>                | 9                            | 27                           | 4.7 (4.3 – 4.9)                |
| <b>Contact Occurrence</b>          | 7                            | 29                           | 4.7 (4.3 – 5)                  |
| <b>Axial Skeleton</b>              | 13                           | 59                           | 4.8 (4.3 – 5)                  |
| <b>Subsequent Impact</b>           | 13                           | 43                           | 4.8 (4.6 – 5)                  |
